# Supplementary material for: An ontology for immune epitopes: application to the design of a broad scope database of immune reactivities.
Source: Springer Nature journal article supplement (doi:10.1186/1745-7580-1-2), 2005-01-01
Supplement: Additional file 1 [file 1745-7580-1-2-s1.pdf]

## **Sample Curation of Epitope Data into IEDB Ontology**

This report shows how epitopes and their related information were extracted from two literature references (PubMed ID: [12668642](#) and [12862314](#)) into the Immune Epitope Database and Analysis Resource (IEDB) Ontology. Only the fields for which data were extracted are displayed in this report. A complete listing of IEDB fields along with explanation of their meaning can be found at

<http://www.immuneepitope.org/ontology/index.html>.

**Curation of Literature Reference (PubMed ID : 12668642)**

| <b>REFERENCE – ARTICLE</b> |                                                                                                                                                          |
|----------------------------|----------------------------------------------------------------------------------------------------------------------------------------------------------|
| PUBMED ID                  | 12668642                                                                                                                                                 |
| Title                      | Quantitation of CD8+ T cell responses to newly identified HLA-A*0201-restricted T cell epitopes conserved among vaccinia and variola (smallpox) viruses. |
| Author                     | Terajima M, Cruz J, Raines G, Kilpatrick ED, Kennedy JS, Rothman AL, Ennis FA                                                                            |
| Pub Date                   | 2003 Apr                                                                                                                                                 |

| <b>EPITOPE 1 of 2</b>                                         |                                                |
|---------------------------------------------------------------|------------------------------------------------|
| <b>EPITOPE STRUCTURE</b>                                      |                                                |
| Epitope Name                                                  | 74A                                            |
| Chemical Type                                                 | Peptide / Protein                              |
| Continuous Epitope                                            | Continuous                                     |
| Linear Sequence                                               | CLTEYLWV                                       |
| Author Identified Mimotope                                    | No                                             |
| <b>EPITOPE SOURCE</b>                                         |                                                |
| Epitopic Region / Domain                                      | No                                             |
| Source Species                                                | Vaccinia Virus                                 |
| Strain                                                        | Ankara                                         |
| Chemical Type of Source Antigen                               | Peptide / Protein                              |
| Protein Name                                                  | 21.7 K protein                                 |
| GenBank ID                                                    | 2772819                                        |
| Epitope Starting Position                                     | 79                                             |
| Epitope Ending Position                                       | 87                                             |
| <b>MHC BINDING</b>                                            | <b>No data for Epitope 1</b>                   |
| <b>IMMUNE RESPONSE - T Cell Response Data 1 for EPITOPE 1</b> |                                                |
| <b>IMMUNIZATION</b>                                           |                                                |
| <b>Immunized Species</b>                                      |                                                |
| Species                                                       | Homo Sapiens                                   |
| Disease Name                                                  | Healthy                                        |
| Immunization category                                         | Administration                                 |
| <b>Immunogen</b>                                              |                                                |
| Immunogen Type                                                | Source Species                                 |
| Name                                                          | Dryvax Vaccine                                 |
| Source Species                                                | Vaccinia Virus                                 |
| Strain                                                        | New York City Board of Health                  |
| <b>In vivo Immunization</b>                                   |                                                |
| Formulation                                                   | Virus Suspension                               |
| Administration Route                                          | Scarification                                  |
| Dose Schedule                                                 | Donors received primary immunization           |
| <b>In vitro Immunization / Restimulation</b>                  |                                                |
| Responder Cells                                               | PBMC                                           |
| Stimulator Cells                                              | PBMC                                           |
| Restimulation Comments                                        | CTL lines were established from a single donor |
| <b>ASSAY</b>                                                  |                                                |
| <b>Effector Cells</b>                                         |                                                |

|                                                               |                                                                                                                                                                                                     |
|---------------------------------------------------------------|-----------------------------------------------------------------------------------------------------------------------------------------------------------------------------------------------------|
| Effector Cells                                                | CTL                                                                                                                                                                                                 |
| Origin                                                        | Cell line / Clone                                                                                                                                                                                   |
| <b>Antigen Presentation</b>                                   |                                                                                                                                                                                                     |
| MHC Allele                                                    | HLA A*0201                                                                                                                                                                                          |
| <b>Species of Antigen Presenting Cells</b>                    |                                                                                                                                                                                                     |
| APC - Autologous or Syngeneic?                                | No                                                                                                                                                                                                  |
| <b>Antigen Presenting Cells</b>                               |                                                                                                                                                                                                     |
| Antigen Presenting Cells                                      | C1R cells                                                                                                                                                                                           |
| Origin                                                        | Cell line / Clone                                                                                                                                                                                   |
| <b>Antigen</b>                                                |                                                                                                                                                                                                     |
| Antigen Type                                                  | Epitope                                                                                                                                                                                             |
| <b>Assay Information</b>                                      |                                                                                                                                                                                                     |
| Assay Type                                                    | 51 Chromium Release                                                                                                                                                                                 |
| Type of Response Measured                                     | Killing                                                                                                                                                                                             |
| Qualitative Measurement                                       | Positive                                                                                                                                                                                            |
| Units                                                         | % SL                                                                                                                                                                                                |
| Number of Subjects Tested                                     | 1                                                                                                                                                                                                   |
| Number of Subjects Responded                                  | 1                                                                                                                                                                                                   |
| LOCATION OF DATA                                              | Figure 1                                                                                                                                                                                            |
| <b>IMMUNE RESPONSE - T Cell Response Data 2 for EPITOPE 1</b> |                                                                                                                                                                                                     |
| <b>IMMUNIZATION</b>                                           |                                                                                                                                                                                                     |
| <b>Immunized Species</b>                                      |                                                                                                                                                                                                     |
| Species                                                       | Homo Sapiens                                                                                                                                                                                        |
| Disease Name                                                  | Healthy                                                                                                                                                                                             |
| Immunization category                                         | Administration                                                                                                                                                                                      |
| <b>Immunogen</b>                                              |                                                                                                                                                                                                     |
| Immunogen Type                                                | Source Species                                                                                                                                                                                      |
| Name                                                          | Dryvax Vaccine                                                                                                                                                                                      |
| Source Species                                                | Vaccinia Virus                                                                                                                                                                                      |
| Strain                                                        | New York City Board of Health                                                                                                                                                                       |
| <b>In vivo Immunization</b>                                   |                                                                                                                                                                                                     |
| Formulation                                                   | Virus Suspension                                                                                                                                                                                    |
| Administration Route                                          | Scarification                                                                                                                                                                                       |
| Dose Schedule                                                 | Donors received primary immunization                                                                                                                                                                |
| <b>ASSAY</b>                                                  |                                                                                                                                                                                                     |
| <b>Effector Cells</b>                                         |                                                                                                                                                                                                     |
| Effector Cells                                                | CD8+ T Cells                                                                                                                                                                                        |
| Origin                                                        | Ex vivo                                                                                                                                                                                             |
| <b>Antigen Presentation</b>                                   |                                                                                                                                                                                                     |
| MHC Allele                                                    | HLA A*0201                                                                                                                                                                                          |
| <b>Antigen</b>                                                |                                                                                                                                                                                                     |
| Antigen Type                                                  | Epitope                                                                                                                                                                                             |
| <b>Assay Information</b>                                      |                                                                                                                                                                                                     |
| Assay Type                                                    | FACS / MHC Tetramer Staining                                                                                                                                                                        |
| Type of Response Measured                                     | TCR Binding                                                                                                                                                                                         |
| Qualitative Measurement                                       | Positive                                                                                                                                                                                            |
| Units                                                         | % Population                                                                                                                                                                                        |
| Number of Subjects Tested                                     | 3                                                                                                                                                                                                   |
| Number of Subjects Responded                                  | 3                                                                                                                                                                                                   |
| LOCATION OF DATA                                              | Figure 2, 3                                                                                                                                                                                         |
| COMMENTS ON ASSAY                                             | In all three donors, the frequency of vaccinia specific CD8+ T cells peaked 2 weeks after primary immunization and then declined, but was still detectable 1 to 3 years after primary immunization. |

| <b>IMMUNE RESPONSE - T Cell Response Data 3 for EPITOPE 1</b> |                                                                                                                      |
|---------------------------------------------------------------|----------------------------------------------------------------------------------------------------------------------|
| <b>IMMUNIZATION</b>                                           |                                                                                                                      |
| <b>Immunized Species</b>                                      |                                                                                                                      |
| Species                                                       | Homo Sapiens                                                                                                         |
| Disease Name                                                  | Healthy                                                                                                              |
| Immunization category                                         | Administration                                                                                                       |
| <b>Immunogen</b>                                              |                                                                                                                      |
| Immunogen Type                                                | Source Species                                                                                                       |
| Name                                                          | Dryvax Vaccine                                                                                                       |
| Source Species                                                | Vaccinia Virus                                                                                                       |
| Strain                                                        | New York City Board of Health                                                                                        |
| <b>In vivo Immunization</b>                                   |                                                                                                                      |
| Formulation                                                   | Virus Suspension                                                                                                     |
| Administration Route                                          | Scarification                                                                                                        |
| Dose Schedule                                                 | Donors received primary immunization                                                                                 |
| <b>ASSAY</b>                                                  |                                                                                                                      |
| <b>Effector Cells</b>                                         |                                                                                                                      |
| Effector Cells                                                | T Cells                                                                                                              |
| Origin                                                        | Ex vivo                                                                                                              |
| <b>Antigen Presentation</b>                                   |                                                                                                                      |
| MHC Allele                                                    | HLA A*0201                                                                                                           |
| <b>Species of Antigen Presenting Cells</b>                    |                                                                                                                      |
| APC - Autologous or Syngeneic ?                               | Yes                                                                                                                  |
| <b>Antigen Presenting Cells</b>                               |                                                                                                                      |
| Antigen Presenting Cells                                      | PBMC                                                                                                                 |
| Origin                                                        | Ex vivo                                                                                                              |
| <b>Antigen</b>                                                |                                                                                                                      |
| Antigen Type                                                  | Epitope                                                                                                              |
| <b>Assay Information</b>                                      |                                                                                                                      |
| Assay Type                                                    | ELISPOT                                                                                                              |
| Type of Response Measured                                     | Cytokine Release (IFN-g)                                                                                             |
| Qualitative Measurement                                       | Positive                                                                                                             |
| Units                                                         | SFC                                                                                                                  |
| Number of Subjects Tested                                     | 3                                                                                                                    |
| Number of Subjects Responded                                  | 3                                                                                                                    |
| LOCATION OF DATA                                              | Figure 4                                                                                                             |
| COMMENTS ON ASSAY                                             | IFN-g production peaked two weeks after primary immunization. Response was also shown to Vaccinia virus NYCBH strain |
| <b>Peptide Elution Data</b>                                   | <b>No data for Epitope 1</b>                                                                                         |
| <b>IMMUNE RESPONSE - B Cell</b>                               | <b>No data for Epitope 1</b>                                                                                         |

| <b>EPITOPE 2 of 2</b>           |                   |
|---------------------------------|-------------------|
| <b>EPITOPE STRUCTURE</b>        |                   |
| Epitope Name                    | 165               |
| Chemical Type                   | Peptide / Protein |
| Continuous Epitope              | Continuous        |
| Linear Sequence                 | KVDDTFYYV         |
| Author Identified Mimotope      | No                |
| <b>EPITOPE SOURCE</b>           |                   |
| Epitopic Region / Domain        | No                |
| Source Species                  | Vaccinia Virus    |
| Strain                          | Ankara            |
| Chemical Type of Source Antigen | Peptide / Protein |

|                                                               |                                                |
|---------------------------------------------------------------|------------------------------------------------|
| Protein Name                                                  | Host range protein                             |
| GenBank ID                                                    | 56405257                                       |
| Epitope Starting Position                                     | 74                                             |
| Epitope Ending Position                                       | 82                                             |
| <b>MHC BINDING</b>                                            | <b>No data for Epitope 2</b>                   |
| <b>IMMUNE RESPONSE - T Cell Response Data 1 for EPITOPE 2</b> |                                                |
| <b>IMMUNIZATION</b>                                           |                                                |
| <b>Immunized Species</b>                                      |                                                |
| Species                                                       | Homo Sapiens                                   |
| Disease Name                                                  | Healthy                                        |
| Immunization category                                         | Administration                                 |
| <b>Immunogen</b>                                              |                                                |
| Immunogen Type                                                | Source Species                                 |
| Name                                                          | Dryvax Vaccine                                 |
| Source Species                                                | Vaccinia Virus                                 |
| Strain                                                        | New York City Board of Health                  |
| <b>In vivo Immunization</b>                                   |                                                |
| Formulation                                                   | Virus Suspension                               |
| Administration Route                                          | Scarification                                  |
| Dose Schedule                                                 | Donors received primary immunization           |
| <b>In vitro Immunization / Restimulation</b>                  |                                                |
| Responder Cells                                               | PBMC                                           |
| Stimulator Cells                                              | PBMC                                           |
| Restimulation Comments                                        | CTL lines were established from a single donor |
| <b>ASSAY</b>                                                  |                                                |
| <b>Effector Cells</b>                                         |                                                |
| Effector Cells                                                | CTL                                            |
| Origin                                                        | Cell line / Clone                              |
| <b>Antigen Presentation</b>                                   |                                                |
| MHC Allele                                                    | HLA A*0201                                     |
| <b>Species of Antigen Presenting Cells</b>                    |                                                |
| APC - Autologous or Syngeneic ?                               | No                                             |
| <b>Antigen Presenting Cells</b>                               |                                                |
| Antigen Presenting Cells                                      | C1R cells                                      |
| Origin                                                        | Cell line / Clone                              |
| <b>Antigen</b>                                                |                                                |
| Antigen Type                                                  | Epitope                                        |
| <b>Assay Information</b>                                      |                                                |
| Assay Type                                                    | 51 Chromium Release                            |
| Type of Response Measured                                     | Killing                                        |
| Qualitative Measurement                                       | Positive                                       |
| Units                                                         | % SL                                           |
| Number of Subjects Tested                                     | 1                                              |
| Number of Subjects Responded                                  | 1                                              |
| LOCATION OF DATA                                              | Figure 1                                       |
| <b>IMMUNE RESPONSE - T Cell Response Data 2 for EPITOPE 2</b> |                                                |
| <b>IMMUNIZATION</b>                                           |                                                |
| <b>Immunized Species</b>                                      |                                                |
| Species                                                       | Homo Sapiens                                   |
| Disease Name                                                  | Healthy                                        |
| Immunization category                                         | Administration                                 |
| <b>Immunogen</b>                                              |                                                |
| Immunogen Type                                                | Source Species                                 |

|                                                               |                                                                                                                                                                                                     |
|---------------------------------------------------------------|-----------------------------------------------------------------------------------------------------------------------------------------------------------------------------------------------------|
| Name                                                          | Dryvax Vaccine                                                                                                                                                                                      |
| Source Species                                                | Vaccinia Virus                                                                                                                                                                                      |
| Strain                                                        | New York City Board of Health                                                                                                                                                                       |
| <b>In vivo Immunization</b>                                   |                                                                                                                                                                                                     |
| Formulation                                                   | Virus Suspension                                                                                                                                                                                    |
| Administration Route                                          | Scarification                                                                                                                                                                                       |
| Dose Schedule                                                 | Donors received primary immunization                                                                                                                                                                |
| <b>ASSAY</b>                                                  |                                                                                                                                                                                                     |
| <b>Effector Cells</b>                                         |                                                                                                                                                                                                     |
| Effector Cells                                                | CD8+ T Cells                                                                                                                                                                                        |
| Origin                                                        | Ex vivo                                                                                                                                                                                             |
| <b>Antigen Presentation</b>                                   |                                                                                                                                                                                                     |
| MHC Allele                                                    | HLA A*0201                                                                                                                                                                                          |
| <b>Antigen</b>                                                |                                                                                                                                                                                                     |
| Antigen Type                                                  | Epitope                                                                                                                                                                                             |
| <b>Assay Information</b>                                      |                                                                                                                                                                                                     |
| Assay Type                                                    | FACS / MHC Tetramer Staining                                                                                                                                                                        |
| Type of Response Measured                                     | TCR Binding                                                                                                                                                                                         |
| Qualitative Measurement                                       | Positive                                                                                                                                                                                            |
| Units                                                         | % Population                                                                                                                                                                                        |
| Number of Subjects Tested                                     | 3                                                                                                                                                                                                   |
| Number of Subjects Responded                                  | 3                                                                                                                                                                                                   |
| LOCATION OF DATA                                              | Figure 2, 3                                                                                                                                                                                         |
| COMMENTS ON ASSAY                                             | In all three donors, the frequency of vaccinia specific CD8+ T cells peaked 2 weeks after primary immunization and then declined, but was still detectable 1 to 3 years after primary immunization. |
| <b>IMMUNE RESPONSE - T Cell Response Data 3 for EPITOPE 2</b> |                                                                                                                                                                                                     |
| <b>IMMUNIZATION</b>                                           |                                                                                                                                                                                                     |
| <b>Immunized Species</b>                                      |                                                                                                                                                                                                     |
| Species                                                       | Homo Sapiens                                                                                                                                                                                        |
| Disease Name                                                  | Healthy                                                                                                                                                                                             |
| Immunization category                                         | Administration                                                                                                                                                                                      |
| <b>Immunogen</b>                                              |                                                                                                                                                                                                     |
| Immunogen Type                                                | Source Species                                                                                                                                                                                      |
| Name                                                          | Dryvax Vaccine                                                                                                                                                                                      |
| Source Species                                                | Vaccinia Virus                                                                                                                                                                                      |
| Strain                                                        | New York City Board of Health                                                                                                                                                                       |
| <b>In vivo Immunization</b>                                   |                                                                                                                                                                                                     |
| Formulation                                                   | Virus Suspension                                                                                                                                                                                    |
| Administration Route                                          | Scarification                                                                                                                                                                                       |
| Dose Schedule                                                 | Donors received primary immunization                                                                                                                                                                |
| <b>ASSAY</b>                                                  |                                                                                                                                                                                                     |
| <b>Effector Cells</b>                                         |                                                                                                                                                                                                     |
| Effector Cells                                                | T Cells                                                                                                                                                                                             |
| Origin                                                        | Ex vivo                                                                                                                                                                                             |
| <b>Antigen Presentation</b>                                   |                                                                                                                                                                                                     |
| MHC Allele                                                    | HLA A*0201                                                                                                                                                                                          |
| <b>Species of Antigen Presenting Cells</b>                    |                                                                                                                                                                                                     |
| APC - Autologous or Syngeneic ?                               | Yes                                                                                                                                                                                                 |
| <b>Antigen Presenting Cells</b>                               |                                                                                                                                                                                                     |
| Antigen Presenting Cells                                      | PBMC                                                                                                                                                                                                |
| Origin                                                        | Ex vivo                                                                                                                                                                                             |
| <b>Antigen</b>                                                |                                                                                                                                                                                                     |

|                                 |                                                                                                                         |
|---------------------------------|-------------------------------------------------------------------------------------------------------------------------|
| Antigen Type                    | Epitope                                                                                                                 |
| <b>Assay Information</b>        |                                                                                                                         |
| Assay Type                      | ELISPOT                                                                                                                 |
| Type of Response Measured       | Cytokine Release (IFN-g)                                                                                                |
| Qualitative Measurement         | Positive                                                                                                                |
| Units                           | SFC                                                                                                                     |
| Number of Subjects Tested       | 3                                                                                                                       |
| Number of Subjects Responded    | 3                                                                                                                       |
| LOCATION OF DATA                | Figure 4                                                                                                                |
| COMMENTS ON ASSAY               | IFN-g production peaked two weeks after primary immunization.<br>Response was also shown to Vaccinia virus NYCBH strain |
| <b>Peptide Elution Data</b>     | <b>No data for Epitope 2</b>                                                                                            |
| <b>IMMUNE RESPONSE - B Cell</b> | <b>No data for Epitope 2</b>                                                                                            |

**Curation of Literature Reference (PubMed ID : 12862314)**

| <b>REFERENCE - ARTICLE</b> |                                                                                                                                                      |
|----------------------------|------------------------------------------------------------------------------------------------------------------------------------------------------|
| PUBMED ID                  | 12862314                                                                                                                                             |
| Title                      | Identification of an epitope of SARS-coronavirus nucleocapsid protein.                                                                               |
| Author                     | Lin Y, Shen X, Yang RF, Li YX, Ji YY, He YY, Shi MD, Lu W, Shi TL, Wang J, Wang HX, Jiang HL, Shen JH, Xie YH, Wang Y, Pei G, Shen BF, Wu JR, Sun B. |
| Pub Date                   | 2003 Jun                                                                                                                                             |

| <b>EPITOPE 1 of 2</b>                                         |                                                               |
|---------------------------------------------------------------|---------------------------------------------------------------|
| <b>EPITOPE STRUCTURE</b>                                      |                                                               |
| Epitope Name                                                  | N1                                                            |
| Chemical Type                                                 | Peptide / Protein                                             |
| Continuous Epitope                                            | Continuous                                                    |
| Linear Sequence                                               | PTDSTDNNONGGRNGARPKQRRPO                                      |
| Author Identified Mimotope                                    | No                                                            |
| <b>EPITOPE SOURCE</b>                                         |                                                               |
| Epitopic Region / Domain                                      | Yes                                                           |
| Source Species                                                | SARS Coronavirus                                              |
| Chemical Type of Source Antigen                               | Peptide / Protein                                             |
| Protein Name                                                  | Nucleocapsid protein                                          |
| GenBank ID                                                    | 30173007                                                      |
| Swiss-Prot ID                                                 | P59595                                                        |
| Epitope Starting Position                                     | 21                                                            |
| Epitope Ending Position                                       | 44                                                            |
| <b>MHC BINDING</b>                                            | <b>No data for Epitope 1</b>                                  |
| <b>IMMUNE RESPONSE - T Cell</b>                               | <b>No data for Epitope 1</b>                                  |
| <b>NATURALLY PROCESSED CONTEXT</b>                            | <b>No data for Epitope 1</b>                                  |
| <b>IMMUNE RESPONSE - B Cell Response Data 1 for EPITOPE 1</b> |                                                               |
| <b>IMMUNIZATION</b>                                           |                                                               |
| <b>Immunized Species</b>                                      |                                                               |
| Species                                                       | Oryctolagus cuniculus                                         |
| Strain / Ethnicity                                            | New Zealand                                                   |
| Disease Name                                                  | Healthy                                                       |
| Immunization category                                         | Administration                                                |
| <b>Immunogen</b>                                              |                                                               |
| Immunogen Type                                                | Epitope                                                       |
| <b>Carrier / Vector</b>                                       |                                                               |
| Carrier Name                                                  | Bovine serum albumin                                          |
| Source Species                                                | Bos taurus                                                    |
| <b>In vivo Immunization</b>                                   |                                                               |
| Formulation                                                   | Peptide emulsion supplemented with Mycobacterium tuberculosis |
| Adjuvant(s)                                                   | Freund's complete; Freund's incomplete (IFA);                 |
| Administration Route                                          | Subcutaneous (s.c)                                            |

|                                                               |                                                                                                                                             |
|---------------------------------------------------------------|---------------------------------------------------------------------------------------------------------------------------------------------|
| Dose Schedule                                                 | Rabbits were injected multiple times on the back. Three weeks later, booster injections were administered with Freund's incomplete adjuvant |
| <b>ASSAY</b>                                                  |                                                                                                                                             |
| <b>Antibody</b>                                               |                                                                                                                                             |
| Antibody Name                                                 | anti-N-protein                                                                                                                              |
| Antibody Type                                                 | Polyclonal                                                                                                                                  |
| Source Species                                                | Oryctolagus cuniculus                                                                                                                       |
| Strain                                                        | New Zealand                                                                                                                                 |
| Isotype                                                       | IgG                                                                                                                                         |
| <b>Antigen</b>                                                |                                                                                                                                             |
| Antigen Type                                                  | Source Protein                                                                                                                              |
| Antigen Name                                                  | Nucleocapsid protein                                                                                                                        |
| Chemical Type                                                 | Peptide / Protein                                                                                                                           |
| Source Species                                                | SARS coronavirus                                                                                                                            |
| GenBank ID                                                    | 30173007                                                                                                                                    |
| SWISS-PROT ID                                                 | P59595                                                                                                                                      |
| <b>Assay Information</b>                                      |                                                                                                                                             |
| Materials Assayed                                             | serum                                                                                                                                       |
| Assay Type                                                    | Western Blot (Immunoblot)                                                                                                                   |
| Type of Response Measured                                     | Antibody Screening                                                                                                                          |
| Qualitative Measurement                                       | Positive                                                                                                                                    |
| LOCATION OF DATA                                              | Figure 2                                                                                                                                    |
| <b>IMMUNE RESPONSE - B Cell Response Data 2 for EPITOPE 1</b> |                                                                                                                                             |
| <b>IMMUNIZATION</b>                                           |                                                                                                                                             |
| <b>Immunized Species</b>                                      |                                                                                                                                             |
| Species                                                       | Oryctolagus cuniculus                                                                                                                       |
| Strain / Ethnicity                                            | New Zealand                                                                                                                                 |
| Disease Name                                                  | Healthy                                                                                                                                     |
| Immunization category                                         | Administration                                                                                                                              |
| <b>Immunogen</b>                                              |                                                                                                                                             |
| Immunogen Type                                                | Epitope                                                                                                                                     |
| <b>Carrier / Vector</b>                                       |                                                                                                                                             |
| Carrier Name                                                  | Bovine serum albumin                                                                                                                        |
| Source Species                                                | Bos taurus                                                                                                                                  |
| <b>In vivo Immunization</b>                                   |                                                                                                                                             |
| Formulation                                                   | Peptide emulsion supplemented with Mycobacterium tuberculosis                                                                               |
| Adjuvant(s)                                                   | Freund's complete; Freund's incomplete (IFA);                                                                                               |
| Administration Route                                          | Subcutaneous (s.c)                                                                                                                          |
| Dose Schedule                                                 | Rabbits were injected multiple times on the back. Three weeks later, booster injections were administered with Freund's incomplete adjuvant |
| <b>ASSAY</b>                                                  |                                                                                                                                             |
| <b>Antibody</b>                                               |                                                                                                                                             |
| Antibody Name                                                 | anti-N-protein                                                                                                                              |
| Antibody Type                                                 | Polyclonal                                                                                                                                  |
| Source Species                                                | Oryctolagus cuniculus                                                                                                                       |
| Strain                                                        | New Zealand                                                                                                                                 |
| Isotype                                                       | IgG                                                                                                                                         |
| <b>Antigen</b>                                                |                                                                                                                                             |
| Antigen Type                                                  | Epitope                                                                                                                                     |
| <b>Carrier / Vector</b>                                       |                                                                                                                                             |
| Carrier Name                                                  | Bovine serum albumin                                                                                                                        |

|                                                               |                                                                                       |
|---------------------------------------------------------------|---------------------------------------------------------------------------------------|
| Source Species                                                | Bos taurus                                                                            |
| <b>Assay Information</b>                                      |                                                                                       |
| Materials Assayed                                             | serum                                                                                 |
| Assay Type                                                    | Western Blot (Immunoblot)                                                             |
| Type of Response Measured                                     | Antibody Screening                                                                    |
| Qualitative Measurement                                       | Positive                                                                              |
| LOCATION OF DATA                                              | Table 1                                                                               |
| COMMENTS ON ASSAY                                             | BSA preabsorption and BSA antigen were conducted as controls with negative responses. |
| <b>IMMUNE RESPONSE - B Cell Response Data 3 for EPITOPE 1</b> |                                                                                       |
| <b>IMMUNIZATION</b>                                           |                                                                                       |
| <b>Immunized Species</b>                                      |                                                                                       |
| Species                                                       | Homo sapiens                                                                          |
| Disease Name                                                  | SARS                                                                                  |
| Disease Stage                                                 | Unknown                                                                               |
| Immunization category                                         | Natural Infection or Exposure                                                         |
| <b>Immunogen</b>                                              |                                                                                       |
| Immunogen Type                                                | Source Species                                                                        |
| Source Species                                                | SARS coronavirus                                                                      |
| <b>ASSAY</b>                                                  |                                                                                       |
| <b>Antibody</b>                                               |                                                                                       |
| Antibody Name                                                 | anti-N-protein                                                                        |
| Antibody Type                                                 | Polyclonal                                                                            |
| Source Species                                                | Homo sapiens                                                                          |
| Isotype                                                       | IgG                                                                                   |
| <b>Antigen</b>                                                |                                                                                       |
| Antigen Type                                                  | Epitope                                                                               |
| <b>Carrier / Vector</b>                                       |                                                                                       |
| Carrier Name                                                  | Bovine serum albumin                                                                  |
| Source Species                                                | Bos taurus                                                                            |
| <b>Assay Information</b>                                      |                                                                                       |
| Materials Assayed                                             | serum                                                                                 |
| Assay Type                                                    | Western Blot (Immunoblot)                                                             |
| Type of Response Measured                                     | Antibody Screening                                                                    |
| Qualitative Measurement                                       | Positive                                                                              |
| Number of Subjects Tested                                     | 9                                                                                     |
| Number of Subjects Responded                                  | 3                                                                                     |
| LOCATION OF DATA                                              | Table 2                                                                               |

|                                 |                         |
|---------------------------------|-------------------------|
| <b>EPITOPE 2 of 2</b>           |                         |
| <b>EPITOPE STRUCTURE</b>        |                         |
| Epitope Name                    | N2                      |
| Chemical Type                   | Peptide / Protein       |
| Continuous Epitope              | Continuous              |
| Linear Sequence                 | GALNTPKDHIGTRNPNNNAATVL |
| Author Identified Mimotope      | No                      |
| <b>EPITOPE SOURCE</b>           |                         |
| Epitopic Region / Domain        | Yes                     |
| Source Species                  | SARS Coronavirus        |
| Chemical Type of Source Antigen | Peptide / Protein       |
| Protein Name                    | Nucleocapsid protein    |
| GenBank ID                      | 30173007                |

|                                                               |                                                                                                                                             |
|---------------------------------------------------------------|---------------------------------------------------------------------------------------------------------------------------------------------|
| Swiss-Prot ID                                                 | P59595                                                                                                                                      |
| Epitope Starting Position                                     | 138                                                                                                                                         |
| Epitope Ending Position                                       | 44                                                                                                                                          |
| <b>MHC BINDING</b>                                            | <b>No data for Epitope 2</b>                                                                                                                |
| <b>IMMUNE RESPONSE - T Cell</b>                               | <b>No data for Epitope 2</b>                                                                                                                |
| <b>NATURALLY PROCESSED CONTEXT</b>                            | <b>No data for Epitope 2</b>                                                                                                                |
| <b>IMMUNE RESPONSE - B Cell Response Data 1 for EPITOPE 2</b> |                                                                                                                                             |
| <b>IMMUNIZATION</b>                                           |                                                                                                                                             |
| <b>Immunized Species</b>                                      |                                                                                                                                             |
| Species                                                       | Oryctolagus cuniculus                                                                                                                       |
| Strain / Ethnicity                                            | New Zealand                                                                                                                                 |
| Disease Name                                                  | Healthy                                                                                                                                     |
| Immunization category                                         | Administration                                                                                                                              |
| <b>Immunogen</b>                                              |                                                                                                                                             |
| Immunogen Type                                                | Epitope                                                                                                                                     |
| <b>Carrier / Vector</b>                                       |                                                                                                                                             |
| Carrier Name                                                  | Bovine serum albumin                                                                                                                        |
| Source Species                                                | Bos taurus                                                                                                                                  |
| <b>In vivo Immunization</b>                                   |                                                                                                                                             |
| Formulation                                                   | Peptide emulsion supplemented with Mycobacterium tuberculosis                                                                               |
| Adjuvant(s)                                                   | Freund's complete; Freund's incomplete (IFA);                                                                                               |
| Administration Route                                          | Subcutaneous (s.c)                                                                                                                          |
| Dose Schedule                                                 | Rabbits were injected multiple times on the back. Three weeks later, booster injections were administered with Freund's incomplete adjuvant |
| <b>ASSAY</b>                                                  |                                                                                                                                             |
| <b>Antibody</b>                                               |                                                                                                                                             |
| Antibody Name                                                 | anti-N-protein                                                                                                                              |
| Antibody Type                                                 | Polyclonal                                                                                                                                  |
| Source Species                                                | Oryctolagus cuniculus                                                                                                                       |
| Strain                                                        | New Zealand                                                                                                                                 |
| Isotype                                                       | IgG                                                                                                                                         |
| <b>Antigen</b>                                                |                                                                                                                                             |
| Antigen Type                                                  | Source Protein                                                                                                                              |
| Antigen Name                                                  | Nucleocapsid protein                                                                                                                        |
| Chemical Type                                                 | Peptide / Protein                                                                                                                           |
| Source Species                                                | SARS coronavirus                                                                                                                            |
| GenBank ID                                                    | 30173007                                                                                                                                    |
| SWISS-PROT ID                                                 | P59595                                                                                                                                      |
| <b>Assay Information</b>                                      |                                                                                                                                             |
| Materials Assayed                                             | serum                                                                                                                                       |
| Assay Type                                                    | Western Blot (Immunoblot)                                                                                                                   |
| Type of Response Measured                                     | Antibody Screening                                                                                                                          |
| Qualitative Measurement                                       | Positive                                                                                                                                    |
| LOCATION OF DATA                                              | Figure 2                                                                                                                                    |
| <b>IMMUNE RESPONSE - B Cell Response Data 2 for EPITOPE 2</b> |                                                                                                                                             |
| <b>IMMUNIZATION</b>                                           |                                                                                                                                             |
| <b>Immunized Species</b>                                      |                                                                                                                                             |
| Species                                                       | Oryctolagus cuniculus                                                                                                                       |
| Strain / Ethnicity                                            | New Zealand                                                                                                                                 |
| Disease Name                                                  | Healthy                                                                                                                                     |

|                                                               |                                                                                                                                             |
|---------------------------------------------------------------|---------------------------------------------------------------------------------------------------------------------------------------------|
| Immunization category                                         | Administration                                                                                                                              |
| <b>Immunogen</b>                                              |                                                                                                                                             |
| Immunogen Type                                                | Epitope                                                                                                                                     |
| <b>Carrier / Vector</b>                                       |                                                                                                                                             |
| Carrier Name                                                  | Bovine serum abalbumin                                                                                                                      |
| Source Species                                                | Bos taurus                                                                                                                                  |
| <b>In vivo Immunization</b>                                   |                                                                                                                                             |
| Formulation                                                   | Peptide emulsion supplemented with Mycobacterium tuberculosis                                                                               |
| Adjuvant(s)                                                   | Freund's complete; Freund's incomplete (IFA);                                                                                               |
| Administration Route                                          | Subcutaneous (s.c)                                                                                                                          |
| Dose Schedule                                                 | Rabbits were injected multiple times on the back. Three weeks later, booster injections were administered with Freund's incomplete adjuvant |
| <b>ASSAY</b>                                                  |                                                                                                                                             |
| <b>Antibody</b>                                               |                                                                                                                                             |
| Antibody Name                                                 | anti-N-protein                                                                                                                              |
| Antibody Type                                                 | Polyclonal                                                                                                                                  |
| Source Species                                                | Oryctolagus cuniculus                                                                                                                       |
| Strain                                                        | New Zealand                                                                                                                                 |
| Isotype                                                       | IgG                                                                                                                                         |
| <b>Antigen</b>                                                |                                                                                                                                             |
| Antigen Type                                                  | Epitope                                                                                                                                     |
| <b>Carrier / Vector</b>                                       |                                                                                                                                             |
| Carrier Name                                                  | Bovine serum albumin                                                                                                                        |
| Source Species                                                | Bos taurus                                                                                                                                  |
| <b>Assay Information</b>                                      |                                                                                                                                             |
| Materials Assayed                                             | serum                                                                                                                                       |
| Assay Type                                                    | Western Blot (Immunoblot)                                                                                                                   |
| Type of Response Measured                                     | Antibody Screening                                                                                                                          |
| Qualitative Measurement                                       | Positive                                                                                                                                    |
| LOCATION OF DATA                                              | Table 1                                                                                                                                     |
| COMMENTS ON ASSAY                                             | BSA preabsorption and BSA antigen were conducted as controls with negative responses.                                                       |
| <b>IMMUNE RESPONSE - B Cell Response Data 3 for EPITOPE 2</b> |                                                                                                                                             |
| <b>IMMUNIZATION</b>                                           |                                                                                                                                             |
| <b>Immunized Species</b>                                      |                                                                                                                                             |
| Species                                                       | Homo sapiens                                                                                                                                |
| Disease Name                                                  | SARS                                                                                                                                        |
| Disease Stage                                                 | Unknown                                                                                                                                     |
| Immunization category                                         | Natural Infection or Exposure                                                                                                               |
| <b>Immunogen</b>                                              |                                                                                                                                             |
| Immunogen Type                                                | Source Species                                                                                                                              |
| Source Species                                                | SARS coronavirus                                                                                                                            |
| <b>ASSAY</b>                                                  |                                                                                                                                             |
| <b>Antibody</b>                                               |                                                                                                                                             |
| Antibody Name                                                 | anti-N-protein                                                                                                                              |
| Antibody Type                                                 | Polyclonal                                                                                                                                  |
| Source Species                                                | Homo sapiens                                                                                                                                |
| Isotype                                                       | IgG                                                                                                                                         |
| <b>Antigen</b>                                                |                                                                                                                                             |
| Antigen Type                                                  | Epitope                                                                                                                                     |
| <b>Carrier / Vector</b>                                       |                                                                                                                                             |
| Carrier Name                                                  | Bovine serum albumin                                                                                                                        |

|                              |                           |
|------------------------------|---------------------------|
| Source Species               | Bos taurus                |
| <b>Assay Information</b>     |                           |
| Materials Assayed            | serum                     |
| Assay Type                   | Western Blot (Immunoblot) |
| Type of Response Measured    | Antibody Screening        |
| Qualitative Measurement      | Negative                  |
| Number of Subjects Tested    | 9                         |
| Number of Subjects Responded | 0                         |
| LOCATION OF DATA             | Table 2                   |
|                              |                           |
